# Supplementary material
Source: Springer Nature journal article supplement (https://www.springermedizin.de/resource/supplementary/12889_2013_5360_MOESM1_ESM.pdf/9495130)

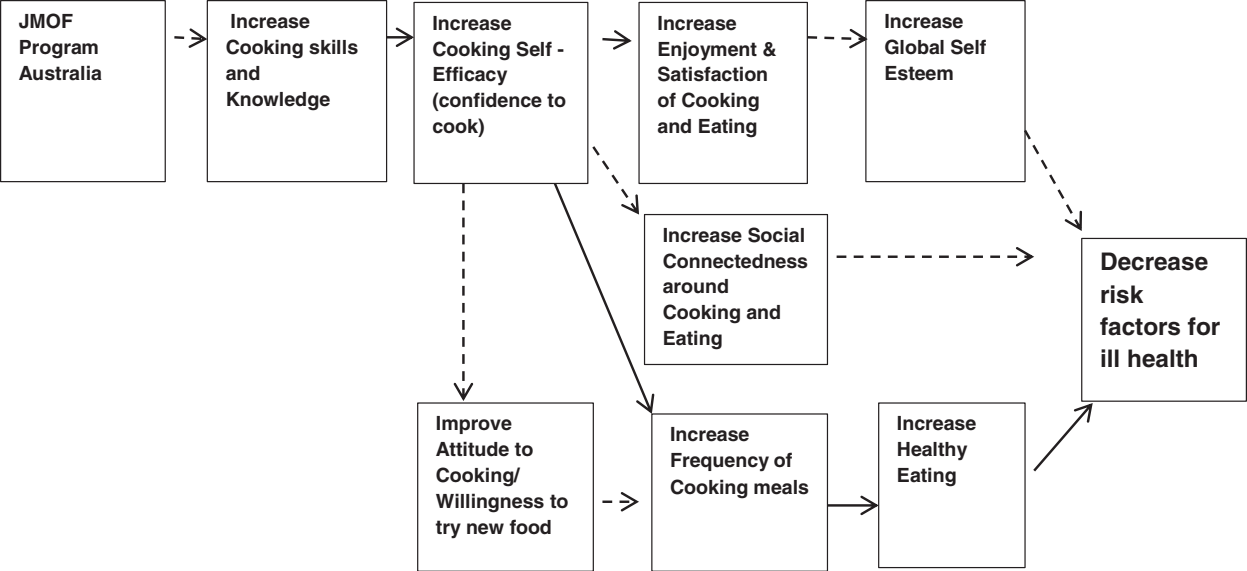

### Key

**Emerging/ convincing evidence** →

**Limited evidence** - - - - ->

**Increase Affordability of Meals**

Supplement: MOESM1 [file 9495130]
